# Supplementary material for: Electrolyte engineering for the mass exfoliation of graphene oxide across wide oxidation degrees
Source: Royal Society of Chemistry journal article supplement (doi:10.1039/d4ta02654c), 2024-01-01
Supplement: d4ta02654c1.pdf [file d4ta02654c1.pdf]

Supplementary Materials for

**“Electrolyte Engineering for the Mass Exfoliation of Graphene Oxide across  
Wide Oxidation Degrees”**

**Authors:** Huili Ren<sup>a†</sup>, Xiaopei Xia<sup>a†</sup>, Yingzhi Sun<sup>a</sup>, Yi Zhai<sup>a</sup>, Zongzheng Zhang<sup>b</sup>, Jiahao Wu,<sup>a</sup> Jing Li<sup>a\*</sup>, Mingjie Liu<sup>a</sup>

**Address:**

<sup>a</sup> Key Laboratory of Bio-inspired Smart Interfacial Science and Technology of Ministry of Education, School of Chemistry, Beihang University, Beijing 100191, China.

<sup>b</sup> School of Chemistry and Materials Science, Ludong University, Yantai 264025, China.

E-mail: [chmlj@buaa.edu.cn](mailto:chmlj@buaa.edu.cn)

† These authors contributed equally to this work.

**This Supplementary Information includes the following sections:**

**Experimental Section/Methods**

**Table S1. The diagram of correspondence between sample labels and electrolyte compositions in the second exfoliation step.**

**S1. Electrolyte concentration-dependent X-ray diffraction (XRD) results and Raman spectra of exfoliated graphite oxides (GOs).**

**S2. The thermogravimetric analysis (TGA) of exfoliated GOs across wide oxidation degrees.**

**S3. The X-ray photoelectron spectroscopy (XPS) spectra for GO samples across wide oxidation degrees.**

**S4. The atomic force microscopy (AFM) height profiles for monolayer GO samples across wide oxidation degrees.**

**S5. The schematic illustration of the fabrication of GO-based composite films.**

**S6. The stress-strain curves for composite films composed of polymer and GO across wide range of oxidation degrees.**

**Table 1. The comparison of measured hole and electron mobility in field-effect transistor devices based on chemical exfoliated GO and rGO.**

**Table 2. The elemental ratios of carbon to oxygen (C/O) of various types of graphene and their respective oxidants, along with the oxidation duration.**

## **Experimental Section/Methods**

**Materials** : Graphite foil (width: 10 cm, thickness: 0.05 mm, purity: 98%) was purchased from SKF (Tianjin) Energy Saving Technology Co., Ltd. Hydrazine sulfate, ammonium sulfate, acrylamide, N,N'-methylenebis(2-propenamide), ammonium persulfate, N,N,N',N'-tetramethylethylenediamine, calcium chloride (CaCl<sub>2</sub>) and sodium alginate (SA) were purchased from Aladdin and used without any additional purification. Polyvinyl alcohol (PVA) was purchased from Sigma-Aldrich and used without further purification. Concentrated sulfuric acid (purity: 95% ~ 98%) was purchased from Jing Chun Chemical Co. Ltd and used without further purification.

### **Electrochemical exfoliation of GO across wide oxidation degrees**

Commercial graphite foils served as the anode (with platinum mesh as the cathode) and were pre-intercalated with concentrated sulfuric acid in an electrochemical cell at a voltage of 2.2 V. Subsequently, the pre-intercalated graphite was transferred to the second cell for exfoliation/oxidation at a voltage of 10 V, containing various electrolytes (hydrazine sulfate: 0.01 M, 0.05 M, 0.1 M, 0.2 M; H<sub>2</sub>SO<sub>4</sub>: 10 wt%, 30 wt%, 50 wt%, 70 wt%; 50 wt% H<sub>2</sub>SO<sub>4</sub> mixed with 0.1 M ammonium sulfate, 0.0001 M KMnO<sub>4</sub>, 0.001 M KMnO<sub>4</sub>, 0.01 M KMnO<sub>4</sub>, and 0.1 M KMnO<sub>4</sub>). It is important to note that EcE-G1 denotes the electrolyte solution composed of 50% H<sub>2</sub>SO<sub>4</sub>-0.01 M hydrazine sulfate used in the second stage. Similarly, EcE-G2, EcE-G3, EcE-G4, EcE-G5, and EcE-G6 represent the electrolyte solutions composed of 50% H<sub>2</sub>SO<sub>4</sub>-0.1 M hydrazine sulfate, 50% H<sub>2</sub>SO<sub>4</sub>-0.001 M KMnO<sub>4</sub>, 50% H<sub>2</sub>SO<sub>4</sub>-0.0001 M KMnO<sub>4</sub>, 50% H<sub>2</sub>SO<sub>4</sub>-0.01 M KMnO<sub>4</sub>, and 50% H<sub>2</sub>SO<sub>4</sub>-0.1 M KMnO<sub>4</sub>, respectively.

**Table S1.** The diagram of correspondence between sample labels and electrolyte compositions in the second exfoliation step.

| Types of graphene | Oxidant                                                            |
|-------------------|--------------------------------------------------------------------|
| EcE-G1            | 0.01 M Hydrazine sulfate                                           |
| EcE-G2            | 0.1 M Ammonium sulfate                                             |
| EcE-G3            | 50 wt% H <sub>2</sub> SO <sub>4</sub> + 0.001 M KMnO <sub>4</sub>  |
| EcE-G4            | 50 wt% H <sub>2</sub> SO <sub>4</sub> + 0.0001 M KMnO <sub>4</sub> |
| EcE-G5            | 50 wt% H <sub>2</sub> SO <sub>4</sub> + 0.01 M KMnO <sub>4</sub>   |
| EcE-G6            | 50 wt% H <sub>2</sub> SO <sub>4</sub> + 0.1 M KMnO <sub>4</sub>    |

### **Preparation of polyacrylamide (PAAm) hydrogels**

A uniform solution phase was prepared by dissolving 15 g of acrylamide, 0.3 g of N,N'-methylenebis(acrylamide), and 0.3 g of ammonium persulfate in 100 mL of distilled water. Subsequently, 300  $\mu$ L N,N,N',N'-tetramethylethylenediamine was added to initiate radical polymerization for 5 minutes at room temperature. The obtained hydrogels were then thoroughly rinsed with abundant water to remove unreacted components and ensure the complete swelling of the hydrogels.

### **Fabrication of GO-based composite films**

Before the fabrication process, the PAAm hydrogels were soaked in deionized water to achieve full swelling. Subsequently, CaCl<sub>2</sub> powder was added to the mixture to form a 0.05 M CaCl<sub>2</sub> solution, facilitating further impregnation of Ca<sup>2+</sup> into the PAAm hydrogels. Additionally, a solution containing PVA, SA, GO, and water was sequentially prepared by sequential addition into a beaker and stirred until homogeneous, with a mass ratio of SA : PVA : GO = 5 : 4 : 1 (referred to as the SA-based solution). During fabrication, an appropriate amount of the SA-based solution was poured onto the

PAAm hydrogel-oil interface. Notably, due to superspreading and the diffusion of  $\text{Ca}^{2+}$  ions from the PAAm hydrogel surface, which facilitated the crosslinking of SA, the SA-based solution rapidly spread between the oil and PAAm hydrogel interface, forming a stable and homogeneous liquid layer. This layer was eventually transformed into a uniform hydrogel film, easily separated from the PAAm hydrogel surface in a water bath. Following this, the composite gel films were dried in an oven at 60 °C and atmospheric pressure for 5 hours, resulting in the collection of uniform and continuous GO-based composite films.

## Characterizations

High-resolution transmission electron microscopy (HRTEM) was conducted using an FEI Titan 80–300 S. Raman spectra were acquired utilizing a LabRAM HR Evolution with a 532 nm laser at ambient conditions. X-ray diffraction (XRD) patterns were collected on Bruker D8 DISCOVER (Cu K $\alpha$  radiation,  $\lambda = 1.54056 \text{ \AA}$ ) at room temperature, with diffraction patterns measured in a  $2\theta$  range of 8–70° at a step speed of 5°/min. X-ray photoelectron spectroscopy (XPS) measurements were conducted with ESCALABXi+ under ultrahigh vacuum conditions. Small-angle X-ray scattering (SAXS) measurements were carried out at Xeuss 3.0 HR using an incident Cu-K $\alpha$  X-ray beam, oriented vertically to the sample plane, with a detector-sample distance of 55 mm. Thermogravimetric analysis (TGA) results were obtained using the STA 449 F5 Jupiter instrument, with a temperature range between room temperature and 800 °C under a nitrogen (N<sub>2</sub>) atmosphere. Atomic force microscopy (AFM) images were obtained in tapping mode using a Bruker Dimension Icon. Mechanical properties were assessed using the ESM303 instrument at a tensile rate of 0.5 mm/min. UV-vis absorption spectra were measured using the SHIMADZU UV-3600 Plus spectrophotometer.

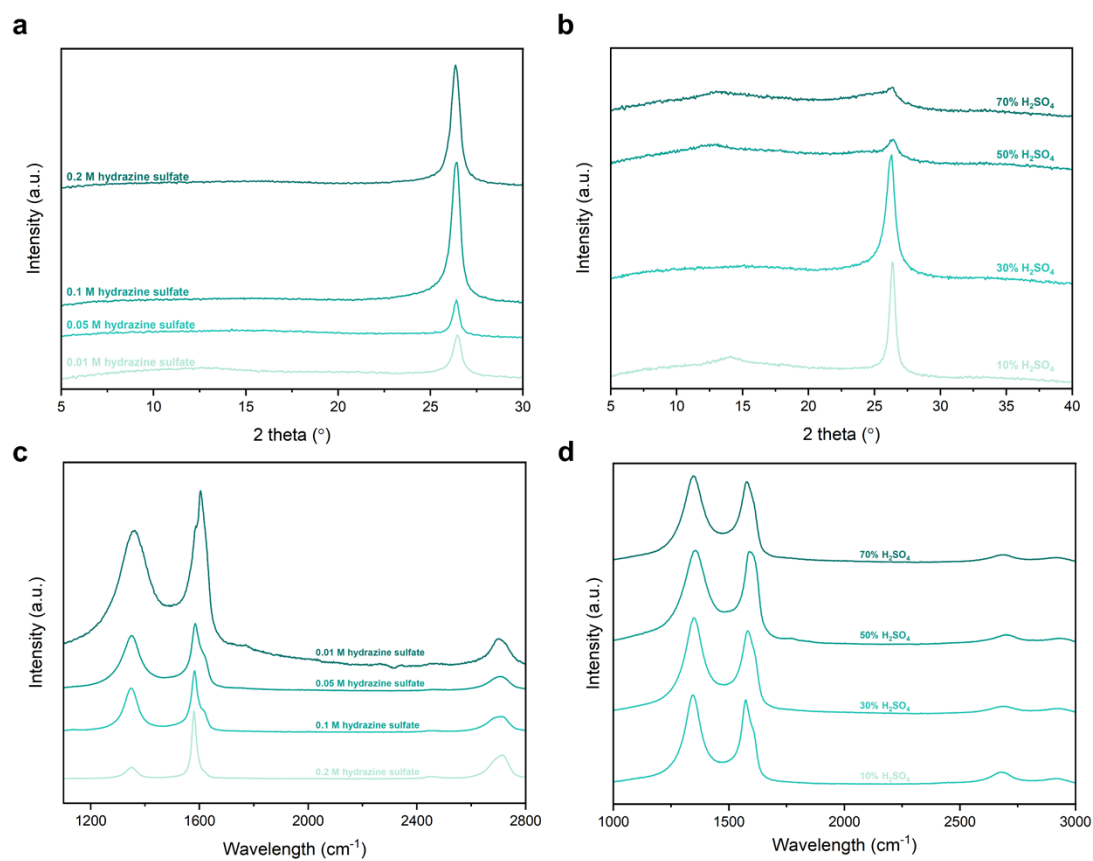

**Supplementary Figure S1. Electrolyte concentration-dependent X-ray diffraction (XRD) results and Raman spectra of exfoliated graphite oxides (GOs).** XRD and Raman spectra of exfoliated GOs in the secondary electrolyte of (a) hydrazine sulfate (0.01 M to 0.2 M), (b) H<sub>2</sub>SO<sub>4</sub> (10 wt% to 70 wt%).



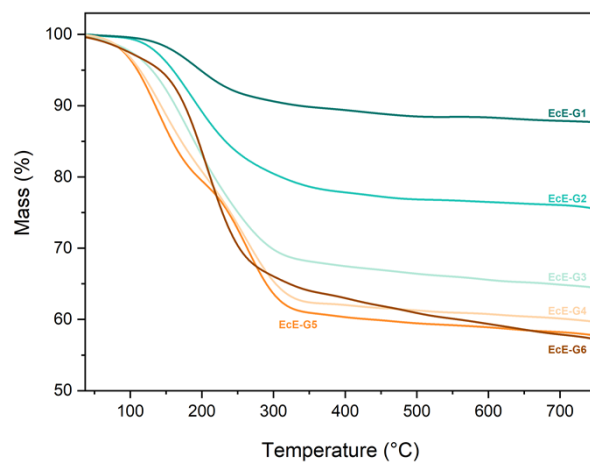

**Supplementary Figure S2. The thermogravimetric analysis (TGA) of exfoliated GOs across wide oxidation degrees.**

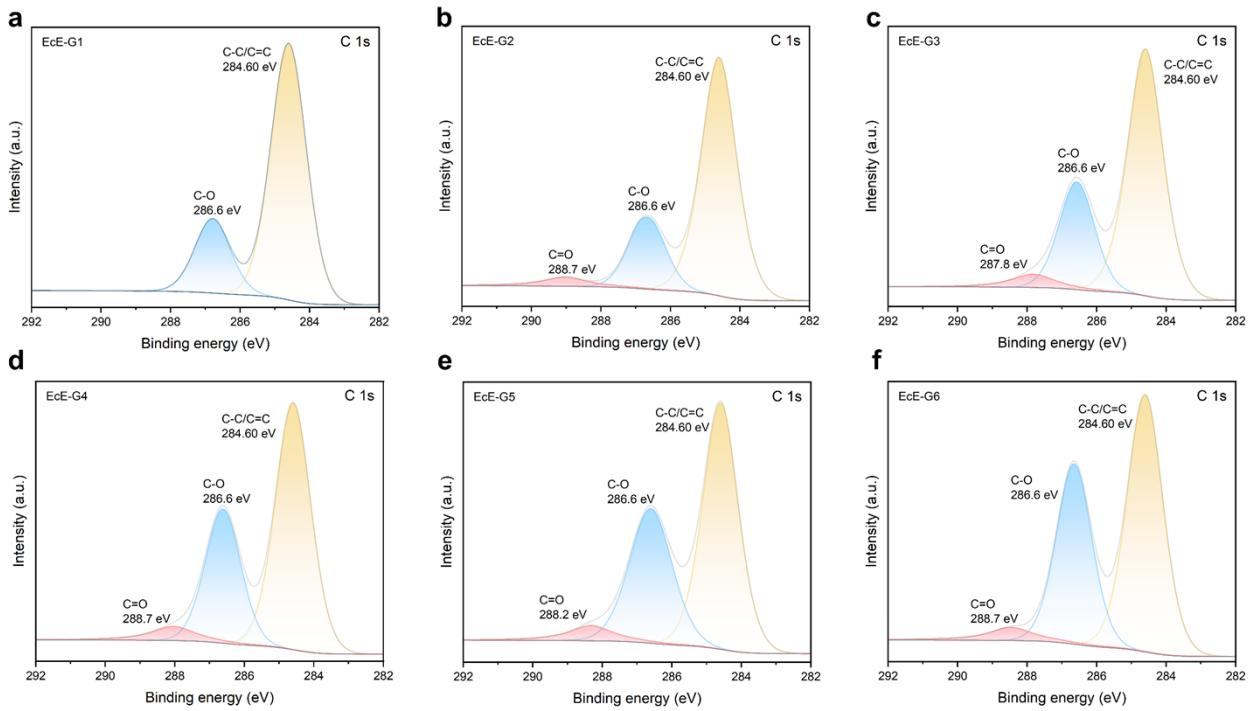

**Supplementary Figure S3. The X-ray photoelectron spectroscopy (XPS) spectra for GO samples across wide oxidation degrees.** Representative XPS spectra of the GOs exfoliated in post-exfoliation electrolytes include: (a) EcE-G1, (b) EcE-G2, (c) EcE-G3, (d) EcE-G4, (e) EcE-G5, and (f) EcE-G6.

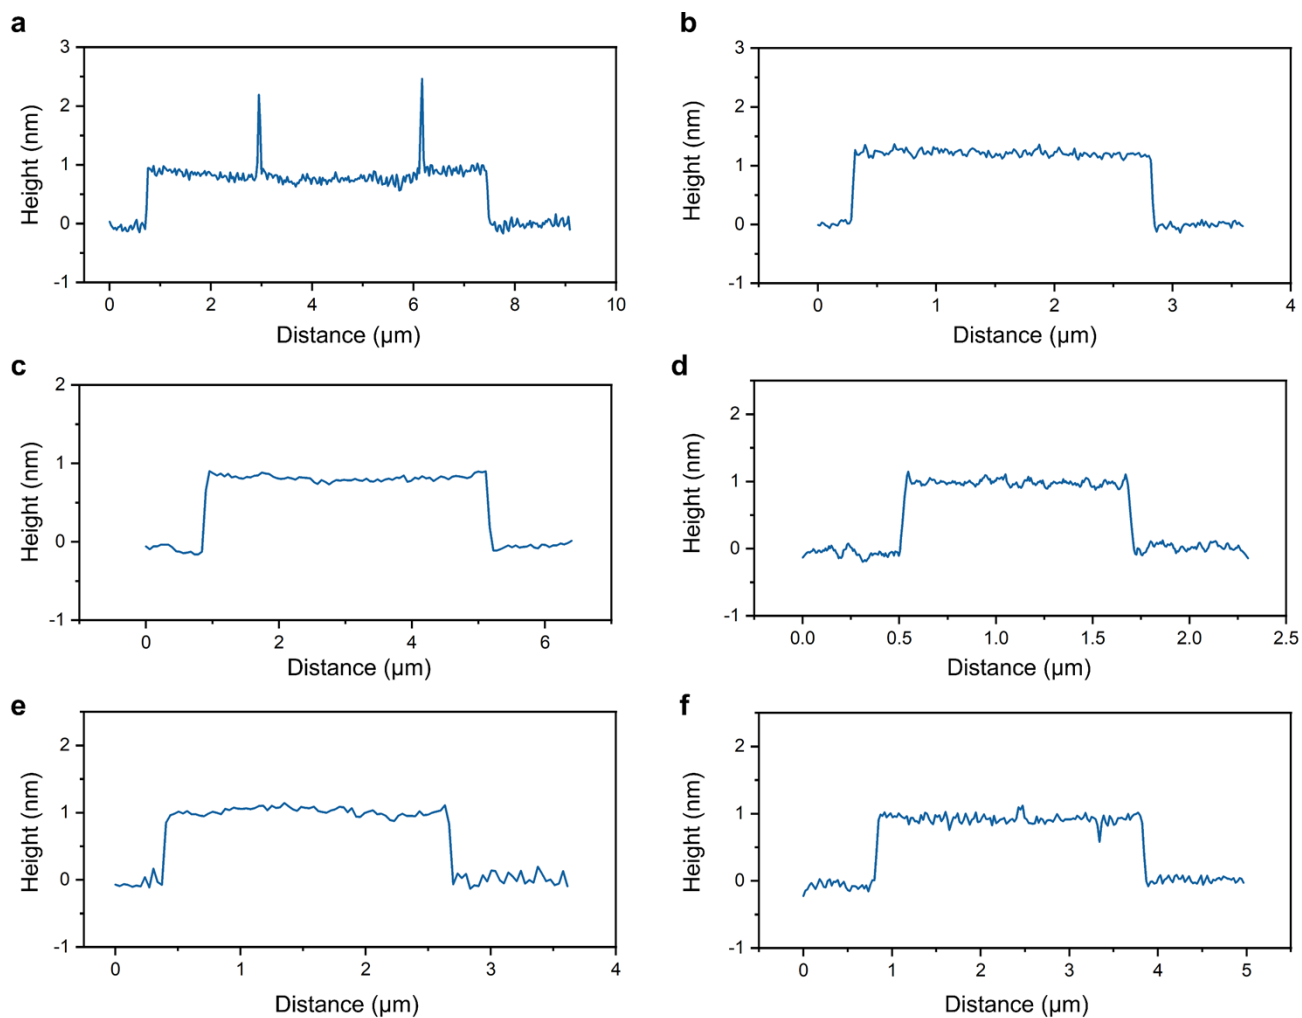

**Supplementary Figure S4. The atomic force microscopy (AFM) height profiles for exfoliated GO monolayers across wide oxidation degrees.** The relevant height profiles in Figure 5 (a~f) along the dashed line in each panel are presented, corresponding to (a) EcE-G1, (b) EcE-G2, (c) EcE-G3, (d) EcE-G4, (e) EcE-G5, and (f) EcE-G6.

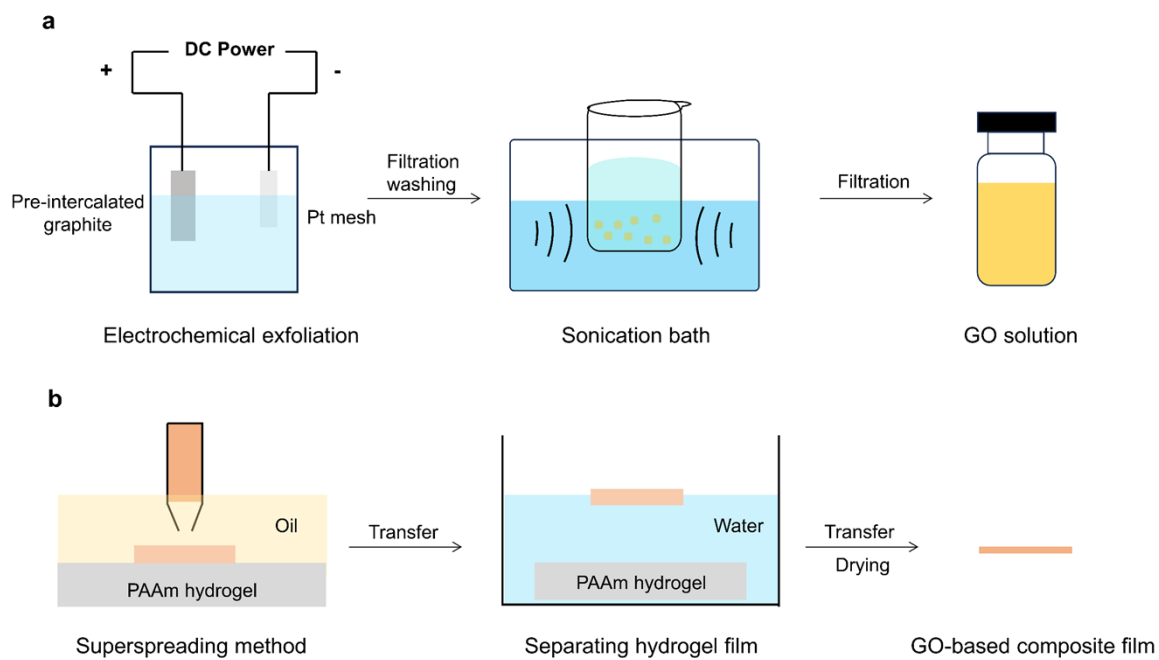

**Supplementary Figure S5. The schematic illustration of the fabrication of GO-based composite films.** (a) The two-step electrochemical approach for the mass production of GO nanosheets. (b) Preparation of composite films using the superspreading method.

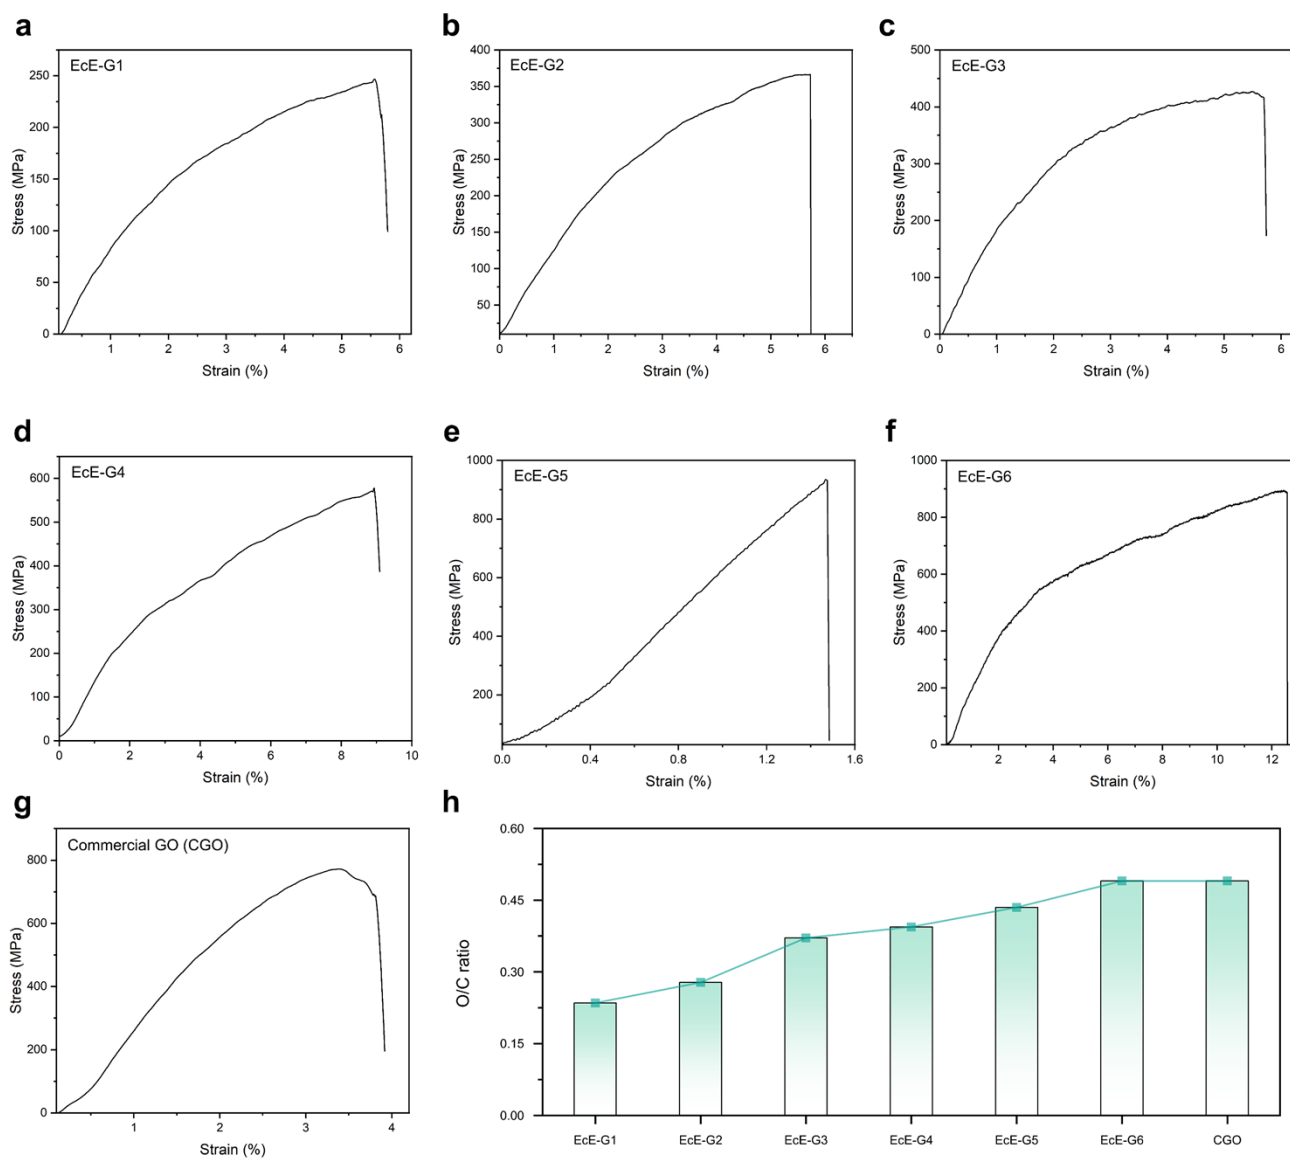

**Supplementary Figure S6. The stress-strain curves for composite films composed of polymer and GO across wide range of oxidation degrees. (a) EcE-G1. (b) EcE-G2. (c) EcE-G3. (d) EcE-G4. (e) EcE-G5. (f) EcE-G6. (g) Commercial GO. (h) The elemental ratios of oxygen to carbon (O/C) of EcE-G1, EcE-G2, EcE-G3, EcE-G4, EcE-G5, EcE-G6, and commercial GO.**

**Table S1.** The comparison of measured hole and electron mobility in field-effect transistor devices based on chemical exfoliated GO and rGO.

| Types of Graphene                        | Number | Chemical treatment                            | Hole mobility ( $\text{cm}^2 \text{V}^{-1} \text{s}^{-1}$ ) | Electron mobility ( $\text{cm}^2 \text{V}^{-1} \text{s}^{-1}$ ) | Reference |
|------------------------------------------|--------|-----------------------------------------------|-------------------------------------------------------------|-----------------------------------------------------------------|-----------|
| Graphene Oxide (GO)                      | 1      | GO                                            | 0.1-1                                                       | N.A.                                                            | [1]       |
|                                          | 2      | GO                                            | 0.01-10                                                     | N.A.                                                            | [2]       |
| Reduced Graphene Oxide (rGO)             | 3      | Photo-reduced GO                              | 0.03                                                        | 0.01                                                            | [3]       |
|                                          | 4      | Thermal (1000 °C)-reduced GO                  | 5.1                                                         | 1.1                                                             | [4]       |
|                                          | 5      | Reduced GO                                    | 0.01-12                                                     | N.A.                                                            | [5]       |
|                                          | 6      | Hydrazine-reduced GO                          | 0.25-0.67                                                   | N.A.                                                            | [6]       |
|                                          | 7      | Hydrazine-reduced GO                          | 43.6                                                        | 14.9                                                            | [7]       |
|                                          | 8      | Hydrazine-reduced GO                          | 2-200                                                       | 0.5-30                                                          | [8]       |
|                                          | 9      | Na-NH <sub>3</sub> -reduced GO                | 123                                                         | N.A.                                                            | [9]       |
|                                          | 10     | Reduced GO                                    | 0.05-200                                                    | N.A.                                                            | [10]      |
|                                          | 11     | Hydriodic/trifluoroacetic acid-reduced GO     | 250                                                         | 200                                                             | [11]      |
|                                          | 12     | Thermal (1000 °C)-reduced GO (multi-layer)    | 365                                                         | 281                                                             | [4]       |
| Liquid-phase Exfoliated Graphene (LPE-G) | 13     | LPE-G                                         | 95                                                          | N.A.                                                            | [12]      |
| Electrochemical Exfoliated Graphene      | 14     | Diluted H <sub>2</sub> SO <sub>4</sub> -EcE-G | 5.5-17                                                      | N.A.                                                            | [1]       |

|         |    |                                              |     |      |           |
|---------|----|----------------------------------------------|-----|------|-----------|
| (EcE-G) | 15 | $(\text{NH}_4)_2\text{SO}_4\text{-EcE-G}$    | 310 | N.A. | [13]      |
|         | 16 | Radical-assisted-EcE-G                       | 405 | N.A. | [14]      |
|         | 17 | Two-step Electrochemical Exfoliated Graphene | 562 | 892  | This Work |

**Table S2.** The elemental ratios of carbon to oxygen (C/O) of various types of graphene and their respective oxidants, along with the oxidation duration.

| Types of graphene           | C/O ratio | Oxidant                                                                                                         | Data source |
|-----------------------------|-----------|-----------------------------------------------------------------------------------------------------------------|-------------|
| EcE-G1                      | 4.26      | 0.01 M Hydrazine sulfate                                                                                        | This work   |
| EcE-G2                      | 3.60      | 0.1 M Ammonium sulfate                                                                                          | This work   |
| EcE-G3                      | 2.70      | 50 wt% H <sub>2</sub> SO <sub>4</sub> + 0.001 M KMnO <sub>4</sub>                                               | This work   |
| EcE-G4                      | 2.54      | 50 wt% H <sub>2</sub> SO <sub>4</sub> + 0.0001 M KMnO <sub>4</sub>                                              | This work   |
| EcE-G5                      | 2.30      | 50 wt% H <sub>2</sub> SO <sub>4</sub> + 0.01 M KMnO <sub>4</sub>                                                | This work   |
| EcE-G6                      | 2.04      | 50 wt% H <sub>2</sub> SO <sub>4</sub> + 0.1 M KMnO <sub>4</sub>                                                 | This work   |
| Commercial GO               | 2.04      | Concentrated H <sub>2</sub> SO <sub>4</sub> + 3 g/g KMnO <sub>4</sub> +<br>5 mL/g H <sub>2</sub> O <sub>2</sub> | [15]        |
| Hofmann's method<br>GO      | 3.65      | Concentrated H <sub>2</sub> SO <sub>4</sub> + 9 mL/g HNO <sub>3</sub><br>+ 11 g/g KClO <sub>3</sub>             | [16]        |
| Staudenmaier's<br>method GO | 4.00      | Concentrated H <sub>2</sub> SO <sub>4</sub> + 9 mL/g fuming<br>HNO <sub>3</sub> + 11 g/g KClO <sub>3</sub>      | [16]        |
| Hummers' method<br>GO       | 2.05-3.30 | Concentrated H <sub>2</sub> SO <sub>4</sub> + 6 g/g KMnO <sub>4</sub>                                           | [17]        |



## Reference

1. C. Su, A. Lu, Y. Xu, F. Chen, A. N. Khlobystov and L. Li, *ACS Nano*, 2011, **5**, 2332–2339.
2. K. Parvez, S. Yang, X. Feng, and K. Müllen, *Synth. Met.*, 2015, **210**, 123–132.
3. H. Li, S. Pang, S. Wu, X. Feng, K. Müllen and C. Bubeck, *J. Am. Chem. Soc.*, 2011, **133**, 9423–9429.
4. S. Wang, P. K. Ang, Z. Wang, A. L. L. Tang, J. T. L. Thong and K. P. Loh, *Nano Lett.*, 2010, **10**, 92–98.
5. K. Parvez, R. Li, S. R. Puniredd, Y. Hernandez, F. Hinkel, S. Wang, X. Feng and K. Müllen, *ACS Nano*, 2013, **7**, 3598–3606.
6. T. Kobayashi, N. Kimura, J. Chi, S. Hirata and D. Hobara, *Small*, 2010, **6**, 1210–1215.
7. J. Yang, J. W. Kim and H. S. Shin, *Adv. Mater.*, 2012, **24**, 2299–2303.
8. C. G. Navarro, R. T. Weitz, A. M. Bittner, M. Scolari, A. Mews, M. Burghard and K. Kern, *Nano Lett.*, 2007, **7**, 3499–3503.
9. H. Feng, R. Cheng, X. Zhao, X. Duan and J. Li, *Nat. Commun.*, 2013, **4**, 1539.
10. D. Joung and S. I. Khondaker, *Phys. Rev. B*, 2012, **86**, 235423.
11. S. Eigler, M. Enzelberger-Heim, S. Grimm, P. Hofmann, W. Kroener, A. Geworski, C. Dotzer, M. Röckert, J. Xiao, C. Papp, O. Lytken, H. P. Steinrück, P. Müller and A. Hirsch, *Adv. Mater.*, 2013, **25**, 3583–3587.
12. F. Torrisi, T. Hasan, W. Wu, Z. Sun, A. Lombardo, T. S. Kulmala, G. W. Hsieh, S. Jung, F. Bonaccorso, P. J. Paul, D. Chu and A. C. Ferrari, *ACS Nano*, 2012, **6**, 2992–3006.
13. K. Parvez, Z. S. Wu, R. Li, X. Liu, R. Graf, X. Feng and K. Müllen, *J. Am. Chem. Soc.*, 2014, **136**, 6083–6091.
14. S. Yang, S. Brüller, Z. S. Wu, Z. Liu, K. Parvez, R. Dong, F. Richard, P. Samori, X. Feng and K. Müllen, *J. Am. Chem. Soc.*, 2015, **137**, 13927–13932.
15. J. Chen, B. Yao, C. Li and G. Shi, *Carbon*, 2013, **64**, 225–229.
16. J. G. S. Moo, B. Khezri, R. D. Webster and M. Pumera, *ChemPhysChem*, 2014, **15**, 2922–2929.
17. S. Shamaila, A. K. L. Sajjad and A. Iqbal, *Chem. Eng. J.*, 2016, **294**, 458–477.
